# Supplementary material
Source: PubMed Central journal article supplement (PMC3785755)
Supplement: 1315383110_sapp.pdf [file 1315383110_sapp.pdf]

## Supporting Information Appendix for

### Efficient Water Oxidation Catalyzed by Cationic Cobalt Porphyrins:

#### Critical Roles for the Buffer Base

Dong Wang and John T. Groves\*

Department of Chemistry, Princeton University, Princeton, NJ 08544

#### Materials and Methods

All chemicals are of the highest commercially available purity and were used as received, unless noted otherwise. Water used in all experiments was distilled and deionized by a Milli-Q system from Millipore. TDMImP was synthesized according to reported procedures (1). TM4PyP and TTMAP were purchased from Frontier Scientific, Inc. Co- and Ga-porphyrins were synthesized by metalating the corresponding porphyrin free base with cobalt(II) acetate or gallium(III) chloride respectively in H<sub>2</sub>O (2) and purified as the chloride salt by a double-precipitation method (3).

UV-vis spectra were recorded with a Hewlett-Packard 8453 diode array spectrometer at room temperature. CV, SWV and controlled potential bulk electrolysis were performed on a BAS 100B electrochemical workstation in pH buffered aqueous solutions at room temperature using a Ag/AgCl reference electrode, a glassy carbon or indium tin oxide (ITO, resistance 10 Ohm per square inch, Nanocs) working electrode, and a Pt auxiliary electrode. pH was measured using an accumet AB15 pH electrode from Fisher Scientific. O<sub>2</sub> evolution was measured by a YSI 550A Clark electrode from Fondriest Environmental. ESEM and EDX analysis were carried out on a Quanta 200 FEG ESEM. Details about fitting the buffer concentration effect on water oxidation catalysis are described below.

#### Data fitting.

Electrocatalytic equation:

$$i_{\text{cat}} = nFAD_{\text{cat}}^{1/2}C_{\text{cat}}k_{\text{cat}}^{1/2}, k_{\text{cat}} = k_{\text{water}} + k_{\text{b}}[\text{B}]$$

$$(i_{\text{cat}}/i_{\text{water}})^2 = (C_{\text{cat}}/C_{\text{cat}}^0)^2(k_{\text{cat}}/k_{\text{water}}) = (C_{\text{cat}}/C_{\text{cat}}^0)^2(1 + k_{\text{b}}[\text{B}]/k_{\text{water}}) \quad (\text{S1})$$

$i_{\text{cat}}$ : overall catalytic current

$i_{\text{water}}$ : current without the presence of buffer base

n: number of electrons transferred

F: Faraday constant

A: surface area of the working electrode

$C_{\text{cat}}$ : effective concentration of active catalyst

$C_{\text{cat}}^{\circ}$ : total concentration of catalyst

$D_{\text{cat}}$ : diffusion coefficient of catalyst

$k_{\text{cat}}$ : overall rate constant of the O-O bond formation (pseudo-first-order)

$k_{\text{water}}$ : rate constant of the O-O bond formation in unbuffered solution (pseudo-first-order)

$k_b$ : rate constant of the O-O bond formation contributed by the addition of buffer base (second order)

For an inhibition pathway that involves the following equilibria:

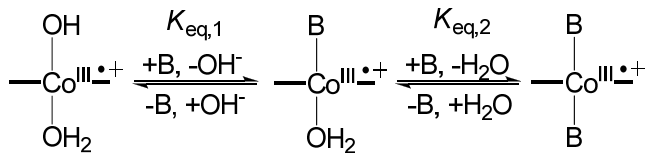

$$K_{\text{eq},1} = [\text{Co}^{\text{III}}\text{-B}][\text{OH}^-]/[\text{Co}^{\text{III}}\text{-OH}][\text{B}]; K_{\text{eq},2} = [\text{Co}^{\text{III}}\text{-B}_2][\text{H}_2\text{O}]/[\text{Co}^{\text{III}}\text{-B}][\text{B}]$$

$$\text{So, } [\text{Co}^{\text{III}}\text{-B}] = K_{\text{eq},1}[\text{Co}^{\text{III}}\text{-OH}][\text{B}]/[\text{OH}^-]$$

$$[\text{Co}^{\text{III}}\text{-B}_2] = K_{\text{eq},2}[\text{Co}^{\text{III}}\text{-B}][\text{B}]/[\text{H}_2\text{O}] = K_{\text{eq},1}K_{\text{eq},2}[\text{Co}^{\text{III}}\text{-OH}][\text{B}]^2/[\text{OH}^-][\text{H}_2\text{O}]$$

$$\text{Mass balance: } [\text{Co}^{\text{III}}\text{-OH}] + [\text{Co}^{\text{III}}\text{-B}] + [\text{Co}^{\text{III}}\text{-B}_2] = [\text{Co}^{\text{III}}\text{-OH}]^{\circ}$$

$$C_{\text{cat}}/C_{\text{cat}}^{\circ} = [\text{Co}^{\text{III}}\text{-OH}]/[\text{Co}^{\text{III}}\text{-OH}]^{\circ} = 1/(1 + K_{\text{eq},1}[\text{B}]/[\text{OH}^-] + K_{\text{eq},1}K_{\text{eq},2}[\text{B}]^2/[\text{OH}^-][\text{H}_2\text{O}]) \quad (\text{S2})$$

Combine eqs S1 and S2:

$$(i_{\text{cat}}/i_{\text{water}})^2 = (1 + k_b[\text{B}]/k_{\text{water}})/(1 + K_{\text{eq},1}[\text{B}]/[\text{OH}^-] + K_{\text{eq},1}K_{\text{eq},2}[\text{B}]^2/[\text{OH}^-][\text{H}_2\text{O}])^2 \quad (\text{S3})$$

For an aqueous solution buffered at pH 7,  $[\text{OH}^-] = 10^{-7}$  M,  $[\text{H}_2\text{O}] = 55.6$  M

At low buffer concentration,

$$1 + K_{\text{eq},1}[\text{B}]/[\text{OH}^-] + K_{\text{eq},1}K_{\text{eq},2}[\text{B}]^2/[\text{OH}^-][\text{H}_2\text{O}] \approx 1$$

Eq S3 then becomes:  $(i_{\text{cat}}/i_{\text{water}})^2 = 1 + k_b[\text{B}]/k_{\text{water}}$ , the same as eq. 4 in the text.

Fits of concentration dependence of catalytic current for four buffers used, as shown in Figure S18, were obtained using eq. S3. Fitted parameters ( $k_b/k_{\text{water}}$ ,  $K_{\text{eq},1}$ , and  $K_{\text{eq},1}K_{\text{eq},2}$ ) are summarized in Table S1.

Table S1. Summary of parameters obtained from fittings according to eq. S3.

| Buffer             | Phthalate | Na-Pi  | <i>n</i> -BuPi | <i>t</i> -BuPi |
|--------------------|-----------|--------|----------------|----------------|
| $K_{eq,1}$         | 2.7E-7    | 4.3E-7 | 1.7E-6         | 6.8E-6         |
| $K_{eq,2}K_{eq,1}$ | 1.6E-5    | 2.1E-4 | 4.8E-3         | 3.4E-2         |
| $k_b/k_{water}$    | 500       | 2400   | 2650           | 4510           |
| $R^2$              | 0.99      | 0.90   | 0.99           | 0.99           |

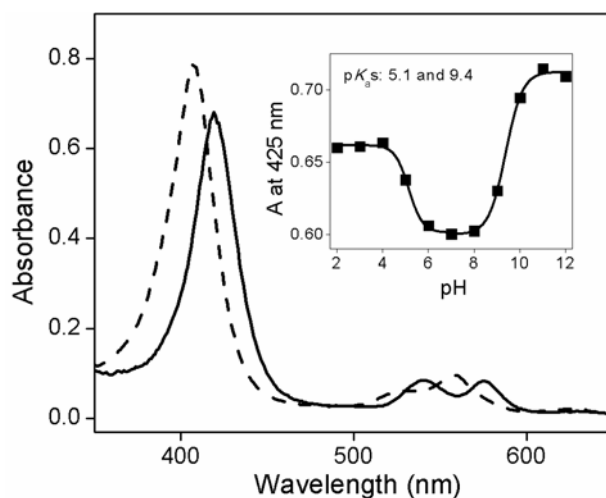

Figure S1. Optical spectra of 10  $\mu\text{M}$  Co-TDMIImP in the form of  $\text{Co}^{\text{II}}(\text{OH}_2)_2$  ( $\lambda_{\text{max}} = 407, 527, 558 \text{ nm}$ ) (dashed) and  $\text{Co}^{\text{III}}(\text{OH})(\text{OH}_2)$  ( $\lambda_{\text{max}} = 419, 540, 575 \text{ nm}$ ) (solid) at pH 7. Species not shown:  $\text{Co}^{\text{III}}(\text{OH}_2)_2$  at pH 2 ( $\lambda_{\text{max}} = 420, 539, 575 \text{ nm}$ ) and  $\text{Co}^{\text{III}}(\text{OH})_2$  at pH 12 ( $\lambda_{\text{max}} = 425, 545, 579 \text{ nm}$ ). Inset: pH titration curve of  $\text{Co}^{\text{III}}$ -TDMIImP monitored at 425 nm. The two  $\text{p}K_{\text{a}}$  values were derived from data fitting.

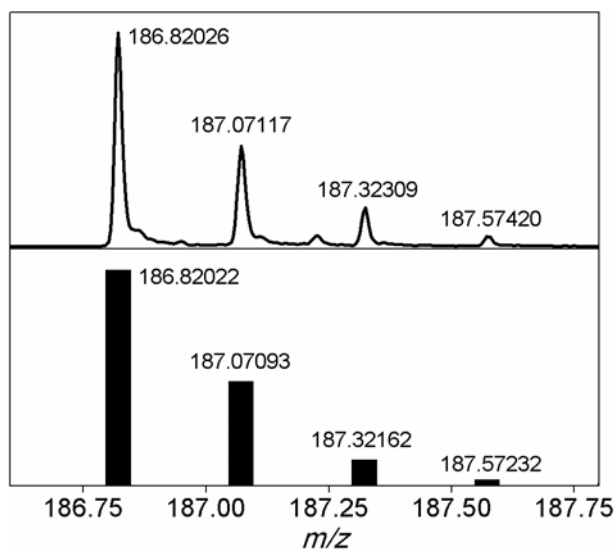

Figure S2. Experimental (top) and simulated (bottom) ESI-MS spectra of  $[\text{Co}^{\text{II}}\text{-TDMIImP}]^{4+}$ . Precise  $m/z$  values are listed next to each peak.

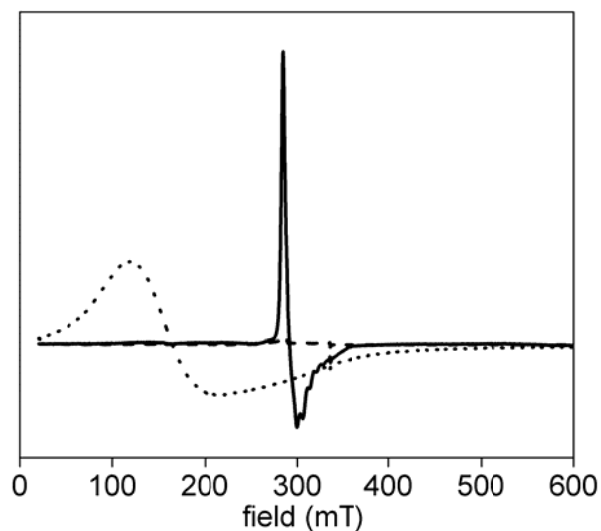

Figure S3. CW X-band EPR spectra of frozen samples in water of 1 mM Co(acetate)<sub>2</sub> (dotted,  $g_{\text{eff}} = 5.56$  and  $3.13$ ), 1 mM Co<sup>II</sup>-TDMIImP (solid,  $g_{\text{eff}} = 2.30$ ), and 1 mM Co<sup>III</sup>-TDMIImP (dashed, EPR silent).  $T = 5$  K; microwave power = 0.2 mW.

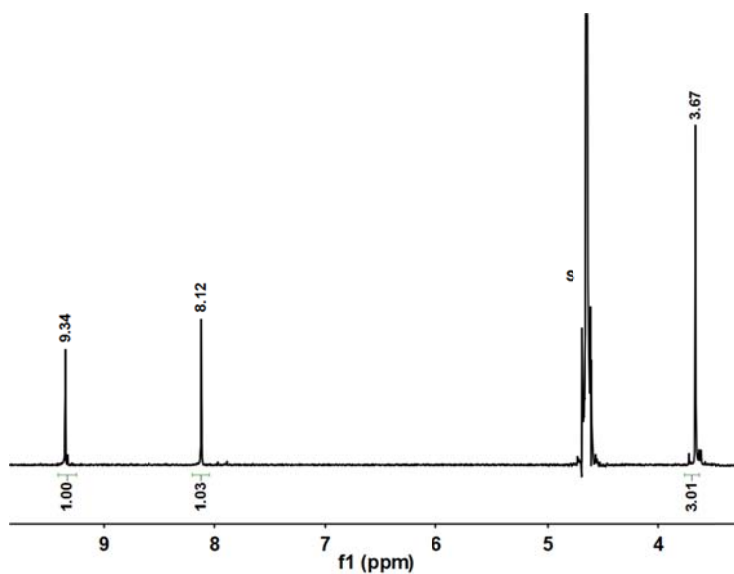

Figure S4. <sup>1</sup>H NMR spectrum of 1 mM Co<sup>III</sup>-TDMIImP obtained in D<sub>2</sub>O. Chemical shifts are labeled above each peak:  $\delta$  9.34 (s, porphyrin  $\beta$ -pyrrole-H, 8H), 8.12 (s, imidazolium-H, 8H), 3.67 (s, methyl-H, 24H).

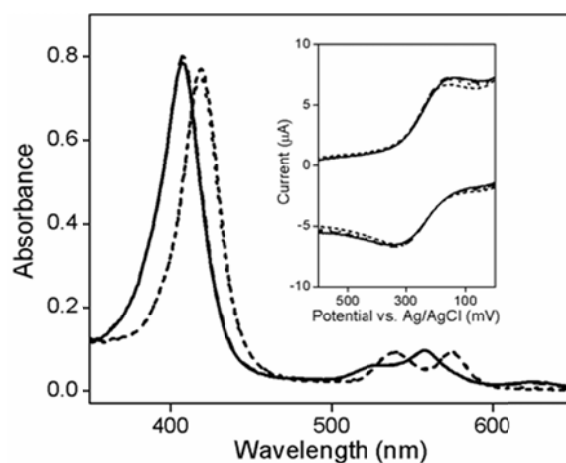

Figure S5. Optical spectra recorded at room temperature of 10  $\mu\text{M}$   $\text{Co}^{\text{II}}$ -TDMIImP in unbuffered  $\text{H}_2\text{O}$  (solid) and 1 M Na-Pi buffer at pH 7 (dashed), and 10  $\mu\text{M}$   $\text{Co}^{\text{III}}$ -TDMIImP in unbuffered  $\text{H}_2\text{O}$  (dotted) and 1 M Na-Pi buffer at pH 7 (short dashed). Inset: CVs of 1 mM Co-TDMIImP at room temperature and a scan rate of  $100 \text{ mV s}^{-1}$  in pH 7 solutions containing Na-Pi buffer of 0.01 M (solid), 0.05 M (dashed), 0.1 M (dotted), and 0.2 M (short dashed) at room temperature.

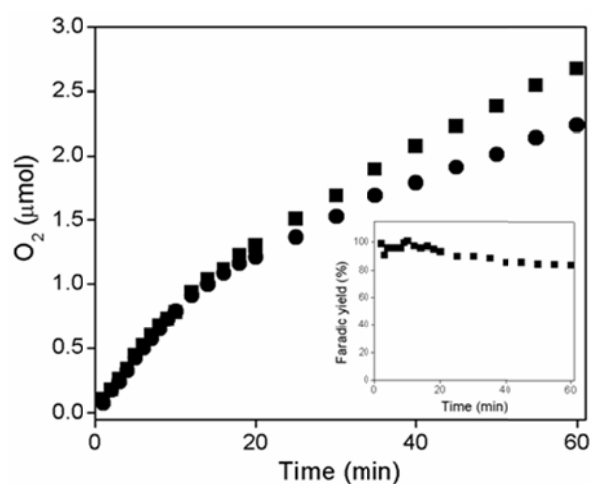

Figure S6. Theoretical (filled squares) and measured (filled circles)  $\text{O}_2$  formation (in  $\mu\text{mol}$ ) during controlled potential electrolysis of 0.5 mM Co-TDMIImP for 1 h at 1300 mV in 0.2 M Na-Pi buffer at pH 7. Inset: plot of the  $\text{O}_2$  formation yield as a function of time.

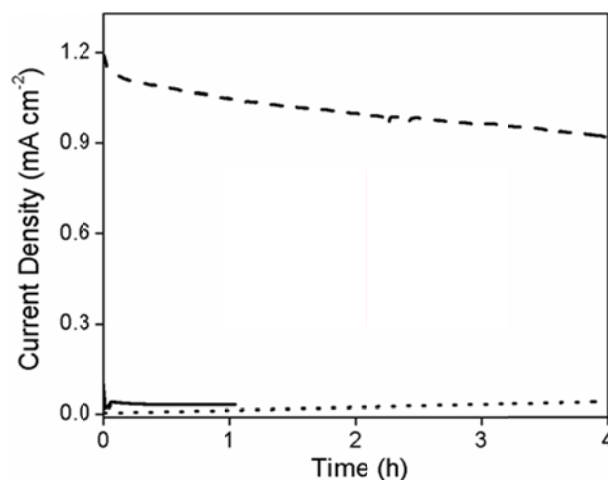

Figure S7. Current density profile of controlled potential bulk electrolysis of buffer background (dotted); 0.5 mM Co-TDMLmP solution (dashed); and clean buffer using the same ITO working electrode after the red trace was obtained (solid). Other conditions: room temperature, 0.2 M Na-Pi buffer at pH 7, applied potential 1300 mV.

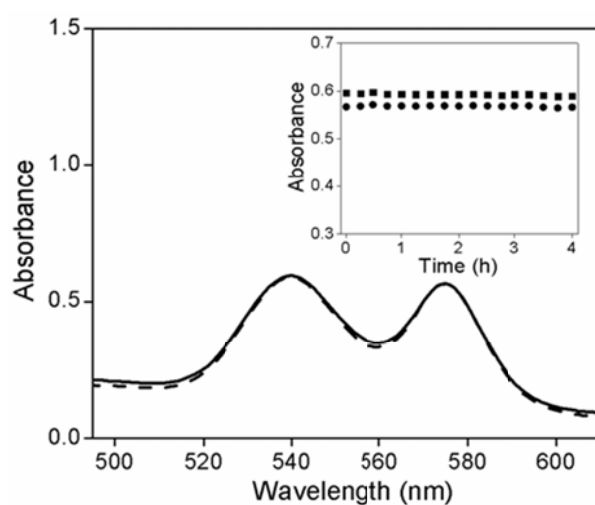

Figure S8. UV-vis spectra of 0.5 mM Co<sup>III</sup>-TDMLmP before (solid) and after (dashed) electrolysis at an applied potential of 1300 mV for 4 hours. Inset: plot of the absorption maximum of the two Q-bands at 540 nm (filled squares) and 575 nm (filled circles) as a function of time.

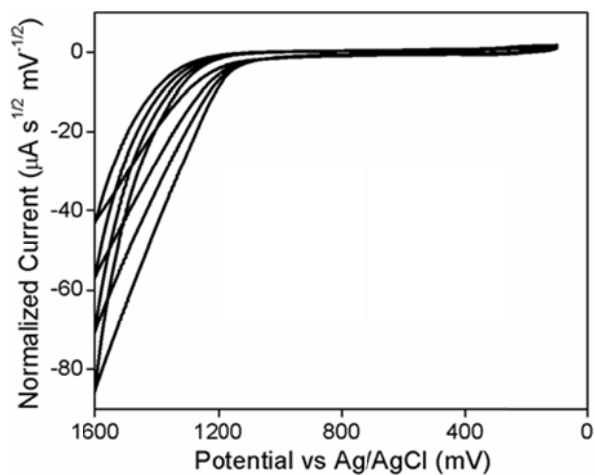

Figure S9. CVs of 1 mM Co-TDMImp at room temperature in 0.2 M Na-Pi buffer at pH 7 showing the current normalized on the basis of the square root of scan rate at a scan rate of (from top to bottom) 500 mV s<sup>-1</sup>, 200 mV s<sup>-1</sup>, 100 mV s<sup>-1</sup>, and 50 mV s<sup>-1</sup>.

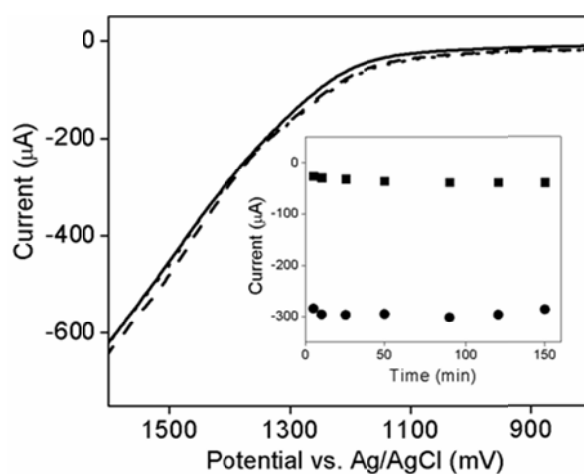

Figure S10. Linear sweep voltammetry of 1 mM Co-TDMImp in 0.2 M Na-Pi buffer at pH 7 monitored for the first 150 minutes after the solution was freshly prepared. Showing are scans taken at 5 (solid), 50 (dashed) and 150 (dotted) minutes. Inset: plot of current at 1100 mV (filled squares) and 1400 mV (filled circles) as a function of time.



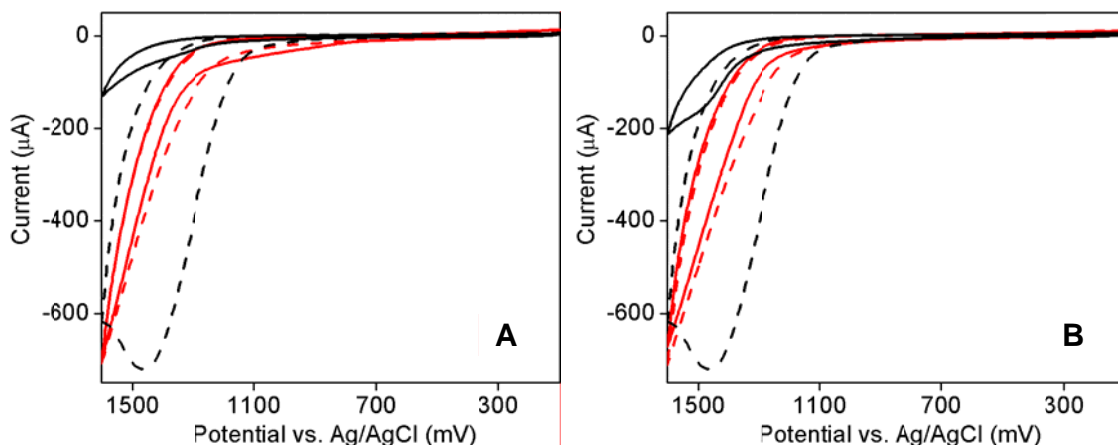

Figure S11. (A) CVs of 1 mM Co-TDMIImP (red) and 0.2 mM  $\text{Co}(\text{NO}_3)_2$  (black) before (dashed) and after (solid) the addition of 0.25 mM EDTA. (B) CVs of 1 mM Co-TDMIImP (red) and 0.2 mM  $\text{Co}(\text{NO}_3)_2$  (black) before (dashed) and 10 minutes after (solid) the addition of 0.5 g Chelex resin. Other conditions: room temperature, 0.2 M Na-Pi buffer, pH 7, scan rate  $100 \text{ mV s}^{-1}$ .

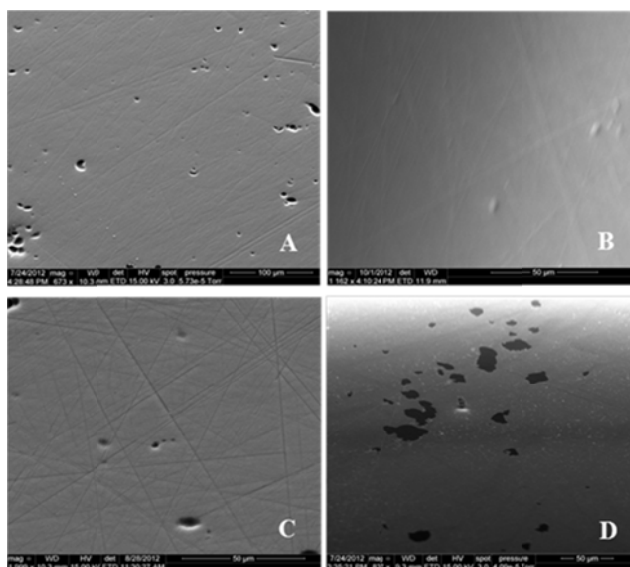

Figure S12. ESEM images of (A) freshly polished glassy carbon electrode; (B) glassy carbon electrode after 20 CV scans in 0.2 M Na-Pi pH 7 solution containing 5 mM Co-TDMIImP; and a cobalt oxide film on a glassy carbon electrode after 20 CV scans in the same buffer containing (C) 0.1 mM and (D) 1 mM  $\text{Co}(\text{NO}_3)_2$ .

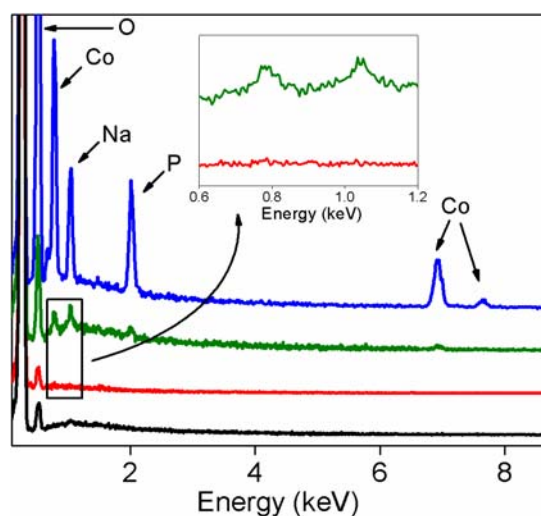

Figure S13. EDX analysis of freshly polished glassy carbon electrode (black); glassy carbon electrode after 20 CV scans in 0.2 M Na-Pi pH 7 solution containing 5 mM Co-TDMIImP (red); and a cobalt oxide film on a glassy carbon electrode after 20 CV scans in the same buffer containing 0.1 mM (green) and 1 mM  $\text{Co}(\text{NO}_3)_2$  (blue).

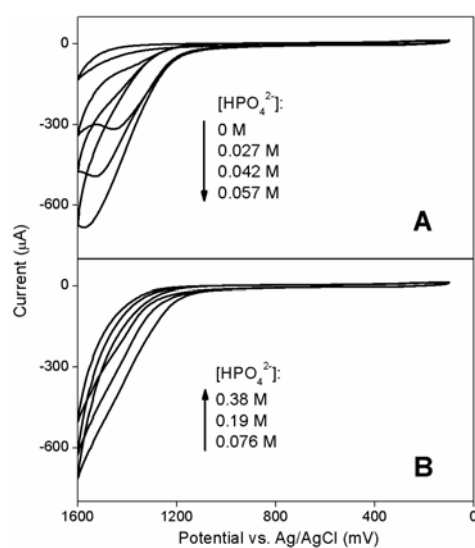

Figure S14. CVs of 1 mM Co-TDMIImP at room temperature and a scan rate of  $100 \text{ mV s}^{-1}$  in pH 7 Na-Pi buffer solutions at  $\text{HPO}_4^{2-}$  concentration of (panel A, from top to bottom) 0 M, 0.027 M, 0.042 M, 0.057 M, and (panel B, from bottom to top) 0.076 M, 0.19 M and 0.38 M. Standard deviations for these curves are in a range of  $\pm 20 \text{ } \mu\text{A}$  and were shown in Figure 2A.

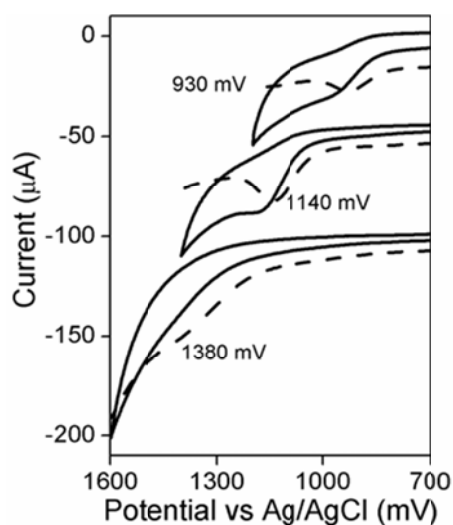

Figure S15. CVs (solid lines) and SWVs (dashed lines) of (from top to bottom) 1 mM Ga<sup>III</sup>-TTMAP, Ga<sup>III</sup>-TM4PyP and Ga<sup>III</sup>-TDMImP. Peak potentials are labeled. Other conditions: room temperature, scan rate 100 mV s<sup>-1</sup>, 0.2 M Na-Pi buffer, pH 7.

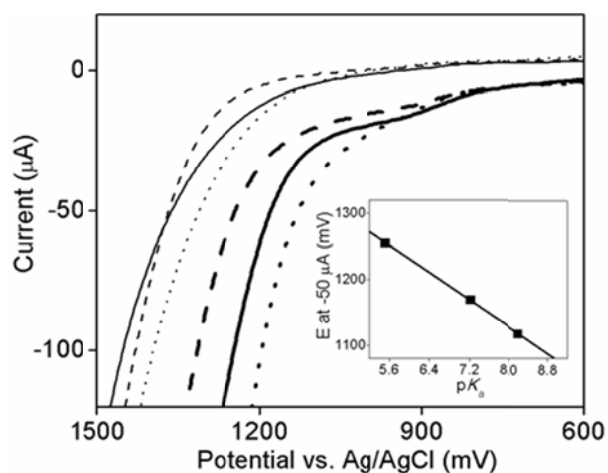

Figure S16. CVs of 1 mM Co-TTMAP at room temperature and a scan rate of 100 mV s<sup>-1</sup> at pH 7 in phthalate (dashed), Na-Pi (solid) and *n*-butylphosphonate (dotted) buffers. Inset: Plot of the potential measured at -50 µA as a function of pK<sub>a</sub> of the buffer species. The red line represents the best linear fit with a slope of -50 mV pK<sub>a</sub><sup>-1</sup>.

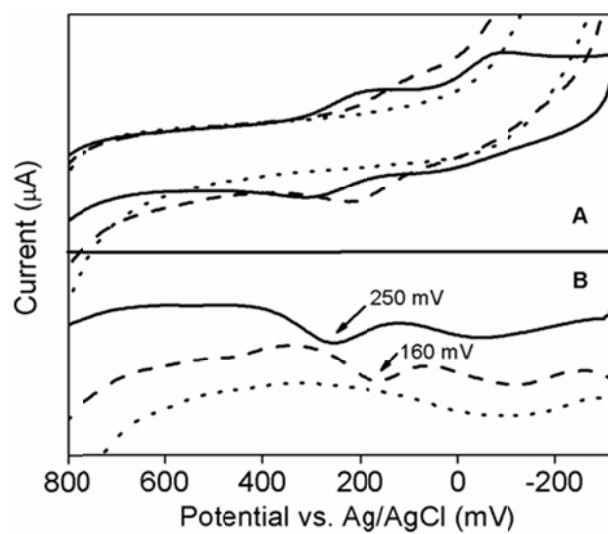

Figure S17. CVs (panel A) and SWVs (panel B) of 1 mM Co-TDMIImP (solid), Co-TM4PyP (dashed) and Co-TTMAP (dotted). Other conditions: room temperature, scan rate  $100 \text{ mV s}^{-1}$ , 0.2 M Na-Pi buffer, pH 7. The  $\text{Co}^{\text{III/II}}$  potentials for Co-TDMIImP and Co-TM4PyP are labeled.

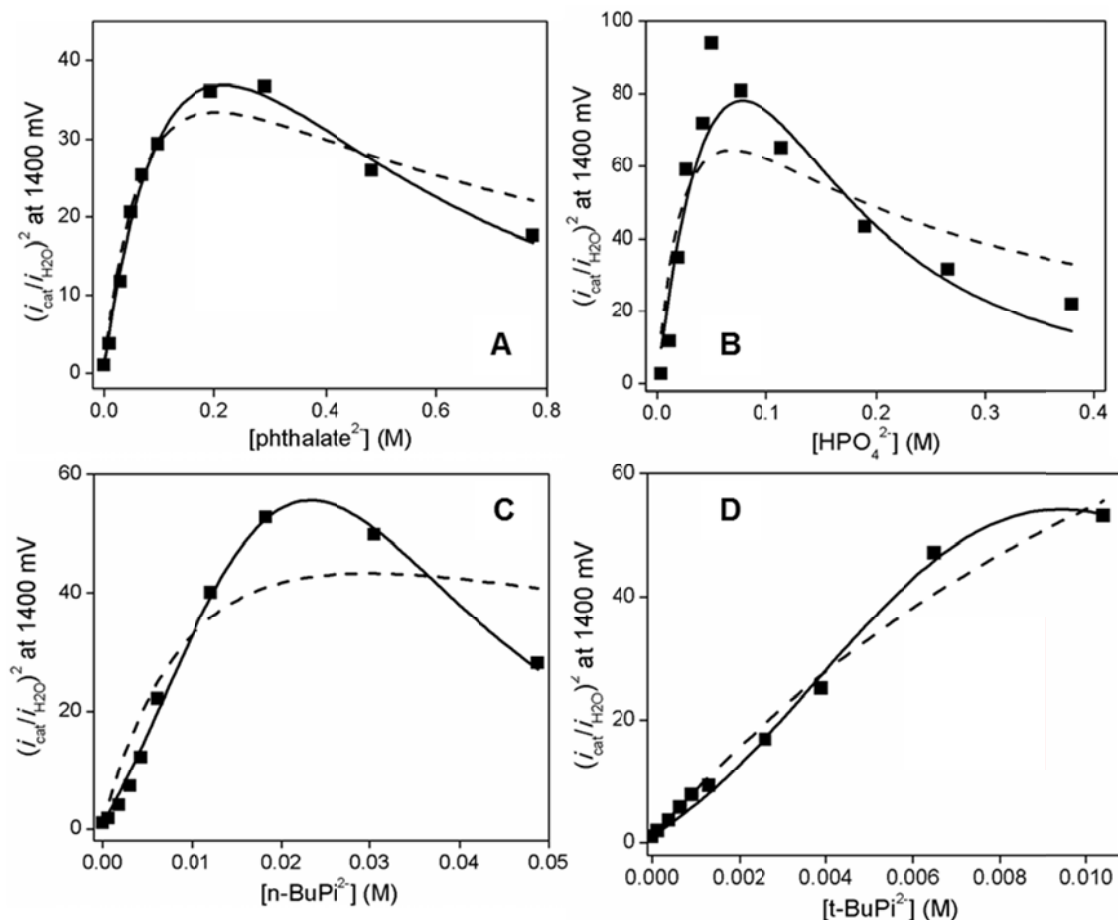

Figure S18. Experimental (filled black squares) and fitted (curves) results of  $(i_{\text{cat}}/i_{\text{water}})^2$  as a function of buffer dianion concentration for (A) phthalate, (B) Na-Pi, (C) *n*-butylphosphonate and (D) *t*-butylphosphonate. Solid curves represent the best fits using eq. S3. Dashed curves represent fits assuming that there is no formation of the doubly bound species  $\text{Co}^{\text{III}}\text{-B}_2$  ( $K_{\text{eq},2} = 0$ ).

1. Tjahjono DH, Akutsu T, Yoshioka N, & Inoue H (1999) Cationic porphyrins bearing diazoliun rings: synthesis and their interaction with calf thymus DNA. *Biochim Biophys Acta* 1472(1-2):333-343.
2. Kachadouriana R, Johnson CA, Mina E, Spasojevic I, & Day BJ (2004) Flavin-dependent antioxidant properties of a new series of meso-*N,N'*-dialkyl-imidazolium substituted manganese(III) porphyrins. *Biochemical Pharmacology* 67(1):77-85.
3. Batinic-Haberle I, Benov L, Spasojevic I, & Fridovich I (1998) The ortho effect makes manganese(III) meso-tetrakis-(*N*-methylpyridinium-2-yl)porphyrin a powerful and potentially useful superoxide dismutase mimic. *J Biol Chem* 273(38):24521-24528.
